# Supplementary material
Source: PubMed Central journal article supplement (PMC7869092)
Supplement: kuerbitz-cercor-2020-bhaa323-supplementary-material_bhaa323.pdf [file kuerbitz-cercor-2020-bhaa323-supplementary-material_bhaa323.pdf]

## Supplementary Material for Kuerbitz et al. (cercor-bhaa323)

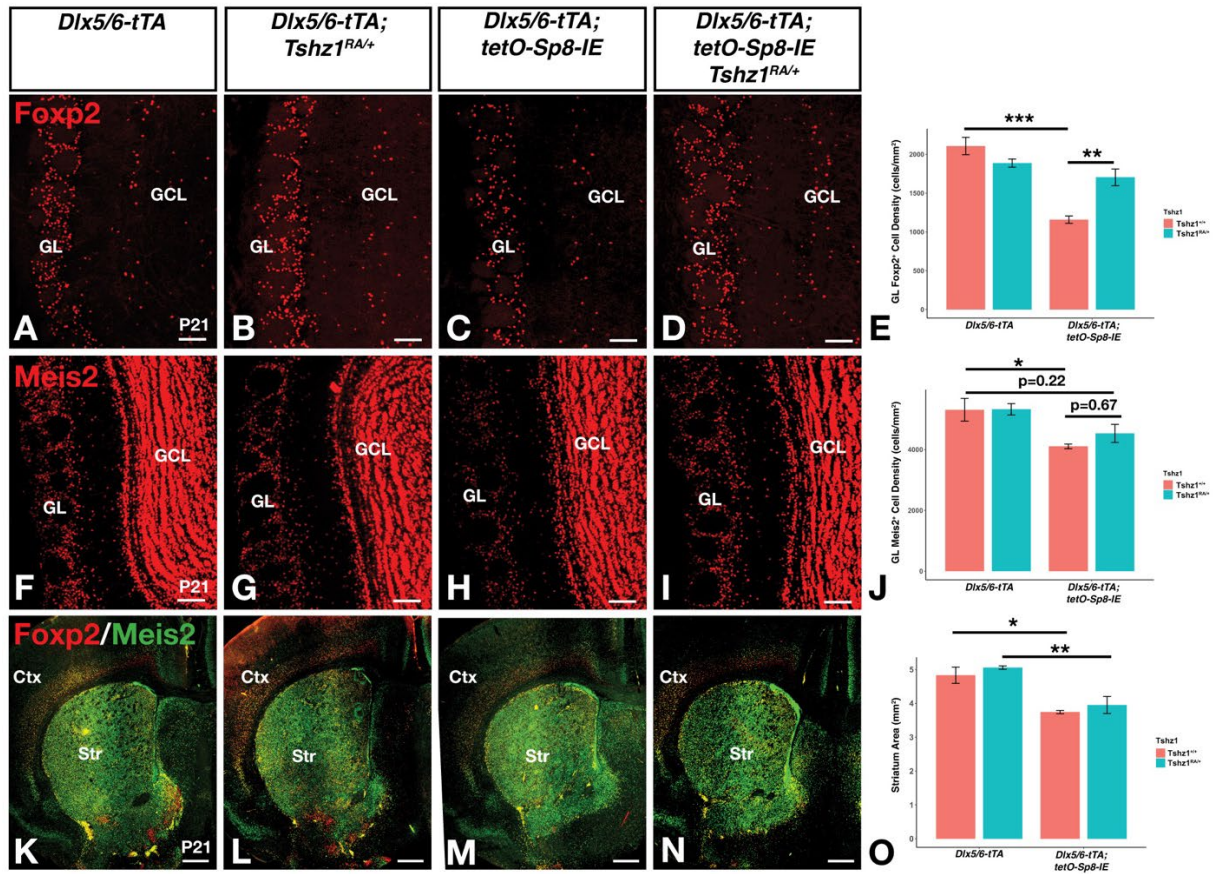

**Supplementary Figure 1.** *Tshz1* gene dosage alters OB interneuron numbers but not striatal size in *Sp8* misexpressing mice. **A-D**, *Sp8* misexpressing mice show a decrease in Foxp2<sup>+</sup> GL cells (**C**) as compared to controls (**A**). *Tshz1* heterozygosity in *Sp8* misexpressing mice significantly increases Foxp2<sup>+</sup> GL cell numbers (**D**) but not to control levels (**A**). **E**, Quantification of Foxp2<sup>+</sup> GL cell densities in wild type and *Tshz1* hets with or without *Sp8* misexpression. **F-I**, *Sp8* misexpressing mice show a decrease in Meis2<sup>+</sup> GL cells (**H**) as compared to controls (**F**). *Tshz1* heterozygosity in *Sp8* misexpressing mice did not significantly increase Meis2<sup>+</sup> GL cell numbers (**I**). **J**, Quantification of Meis2<sup>+</sup> GL cell densities in wild type and *Tshz1* hets with or without *Sp8* misexpression. **K-N**, *Sp8* misexpressing mice show a decrease in striatal area as marked by Foxp2 and Meis2 (**M**) as compared to controls (**K**). *Tshz1*

heterozygosity in *Sp8* misexpressing mice did not significantly alter striatal area (N). O, Quantification of striatal area in wild type and *Tshz1* hets with or without *Sp8* misexpression. Data are represented as mean  $\pm$  SEM and stats were performed using a two-way ANOVA with a post hoc Tukey HSD, \* $p < 0.05$ , \*\* $p < 0.01$ , \*\*\* $p < 0.001$ . Ctx, cortex; GCL, granule cell layer; GL glomerular layer; Str, striatum. Scale bars: A-D, F-I, 100  $\mu$ m; K-N, 500  $\mu$ m.

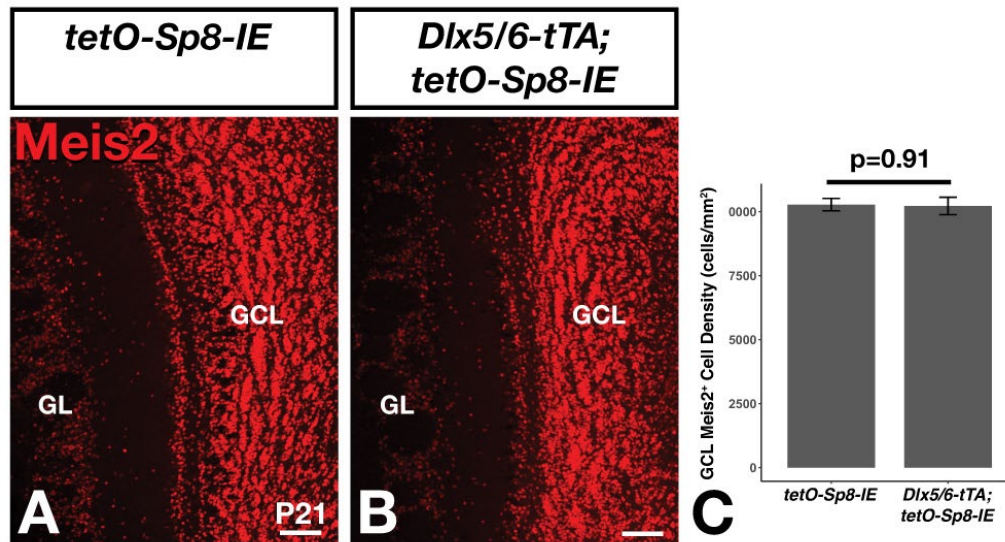

**Supplementary Figure 2.** *Sp8* misexpressing mice exhibit normal numbers of *Meis2*<sup>+</sup> GCL interneurons. A-C, Immunofluorescence (A,B) and quantification (C) of *Meis2*<sup>+</sup> neurons in the GCL of the postnatal olfactory bulb of *Sp8* misexpressing mice which showed no significant effect,  $n=4$  for each group ( $t_6=0.12$ ,  $p=0.91$ ). Data are represented as mean  $\pm$  SEM and stats performed using a Student's t-test. GCL, granule cell layer; GL glomerular layer. Scale bars: A,B, 100  $\mu$ m.

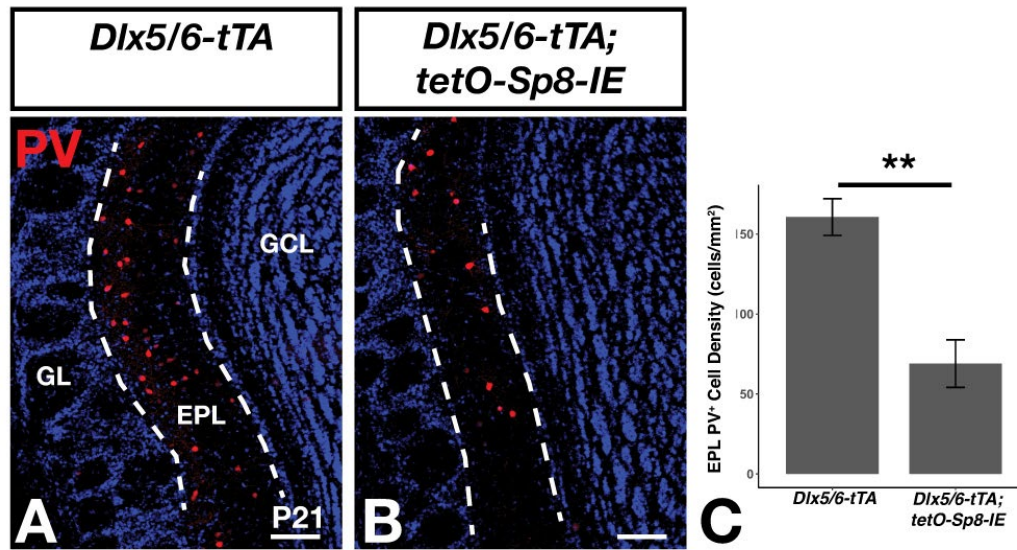

**Supplementary Figure 3.** *Reduced PV<sup>+</sup> interneurons in the EPL of Sp8 misexpressing mice.* A-C, Immunofluorescence (A,B) and quantification (C) of PV<sup>+</sup> neurons in the EPL of the postnatal olfactory bulb of *Sp8* misexpressing mice which showed a 57% reduction of PV<sup>+</sup> EPL cells. DAPI was used as a counterstain. Data are represented as mean  $\pm$  SEM and stats performed using a Student's t-test, \*\* $p < 0.01$ . GCL, granule cell layer; GL glomerular layer. Scale bars: A,B, 100  $\mu$ m.

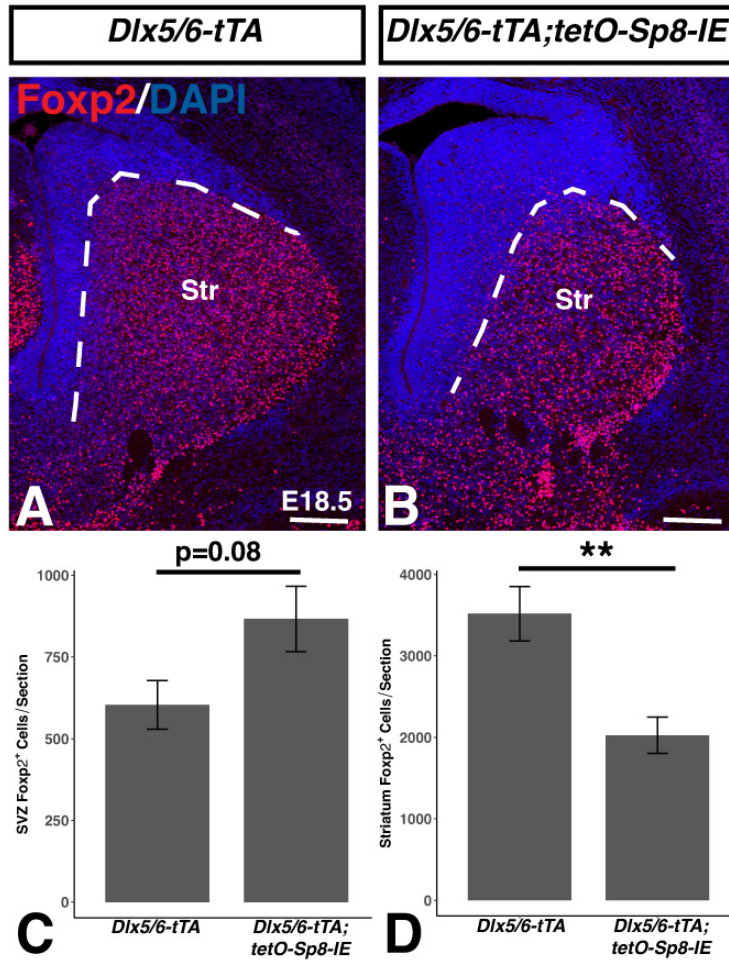

**Supplementary Figure 4.** *Foxp2*<sup>+</sup> cells in the SVZ and striatum of *Sp8* misexpressing mice.

Immunofluorescence (A,B) and quantification of *Foxp2*<sup>+</sup> neurons in the SVZ (C) and striatum (D) of *Sp8* misexpressing embryos which showed a 48.4% reduction of *Foxp2*<sup>+</sup> SPNs and a trend towards an increase in the SVZ in the overexpressing animals. DAPI was used as a counterstain. Data are represented as mean  $\pm$  SEM and stats performed using a Student's t-test, \*\* $p<0.01$ . Str, striatum. Scale bars: A,B, 200  $\mu$ m.
